# Supplementary material for: Air-stable Pd(0) catalyst bearing dual phosphine ligands: a detailed evaluation of air stability and catalytic property in cross-coupling reactions
Source: Royal Society of Chemistry journal article supplement (doi:10.1039/d0dt02744h), 2020-01-01
Supplement: d0dt02744h1.pdf [file d0dt02744h1.pdf]

**Supporting information of**

**Air-stable Pd(0) catalyst bearing dual phosphine ligands: a detailed evaluation of air stability and catalytic property in cross-coupling reactions**

Ryota Sato, Takaki Kanbara\*, Junpei Kuwabara\*

Tsukuba Research Center for Energy Materials Science (TREMS), Graduate School of Pure and Applied Sciences, University of Tsukuba, 1-1-1 Tennodai, Tsukuba, Ibaraki 305-8573, Japan

**Table of Contents**

|                                                       |     |
|-------------------------------------------------------|-----|
| 1. Plausible reaction mechanism (Figure S1)           | S2  |
| 2. NMR spectra of Complex 3 (Figure S2, 3)            | S3  |
| 3. DFT calculation of Pd(0)L <sub>2</sub> (Figure S4) | S4  |
| 4. NMR spectra of coupling products (Figure S5-S14)   | S5  |
| 5. Supporting table (Table S1)                        | S10 |
| 6. Crystallographic data (Table S2)                   | S11 |



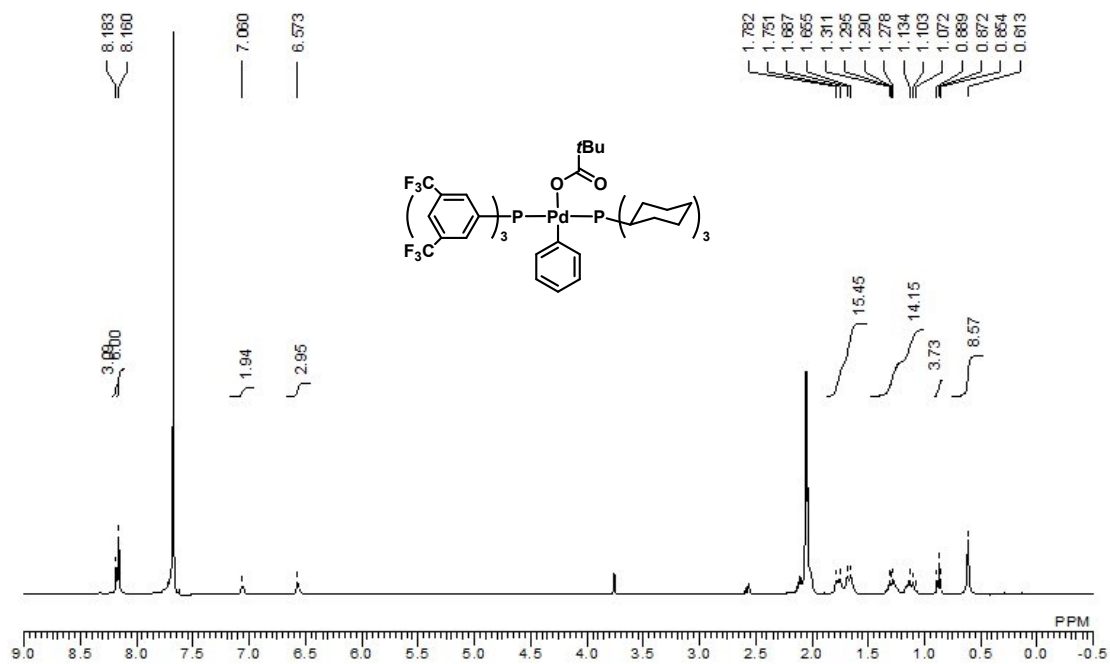

Figure S2.  $^1\text{H}$  NMR spectrum of Complex 3 (400 MHz, acetone- $d_6$ , r.t., under  $\text{N}_2$ ).

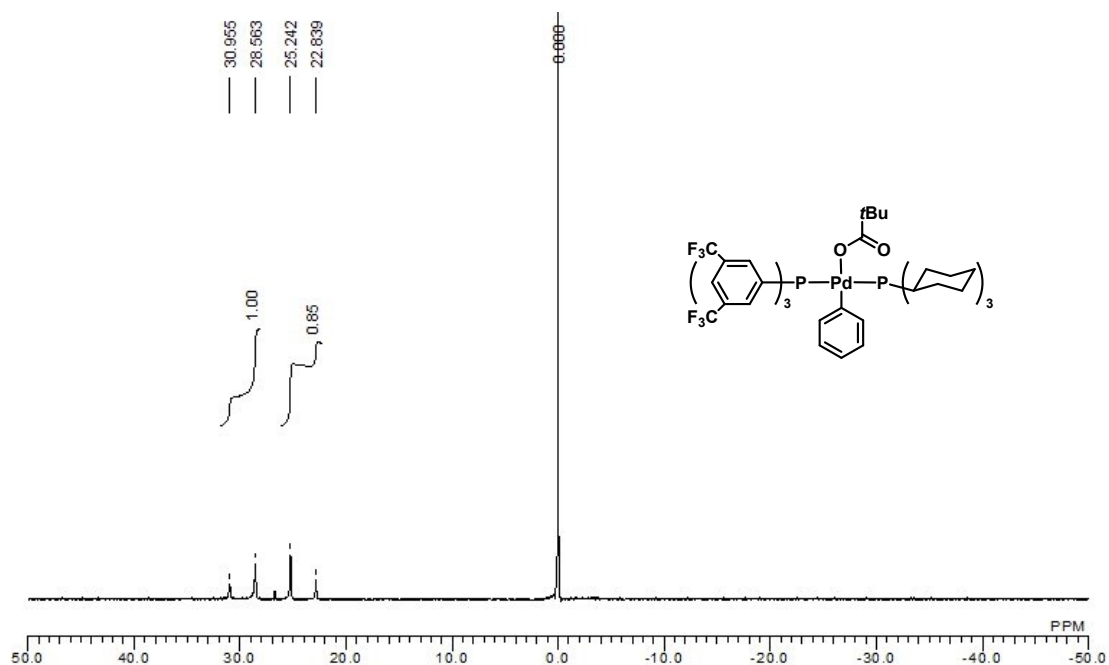

Figure S3.  $^{31}\text{P}$  NMR spectrum of Complex 3 (162 MHz, acetone- $d_6$ , r.t., under  $\text{N}_2$ , external standard: 85%  $\text{H}_3\text{PO}_4$  0 ppm).

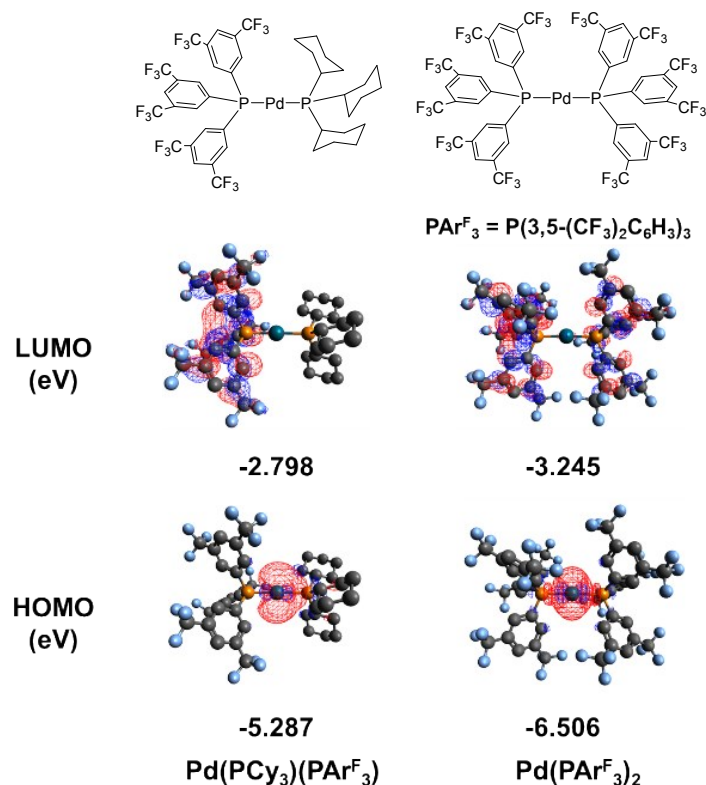

Figure S4. Chemical structures (top), HOMO and LUMO distribution and energy levels of Pd(PCy<sub>3</sub>)(PAr<sup>F<sub>3</sub></sup>) and Pd(PAr<sup>F<sub>3</sub></sup>)<sub>2</sub> based on DFT calculations (bottom).

The high energy Pd-centred HOMO of Pd(PCy<sub>3</sub>)(PAr<sup>F<sub>3</sub></sup>) may contribute to high reactivity in the oxidative addition step. Theoretical calculations have revealed that a transition state of an oxidative addition step involves interaction between an occupied 4d orbital of a Pd centre and an unoccupied  $\sigma^*$  (and  $\pi^*$ ) orbital of a substrate.<sup>S1</sup> The high energy Pd-centred orbital is able to make strong interaction to the high-lying  $\sigma^*$  (and  $\pi^*$ ) orbital of the substrate,<sup>S2</sup> which resulted in the low activation energy of the oxidative addition step. From these insights, an energy level of Pd-centred orbital is expected to be a simple guideline for estimating activity for oxidative addition of the complex.

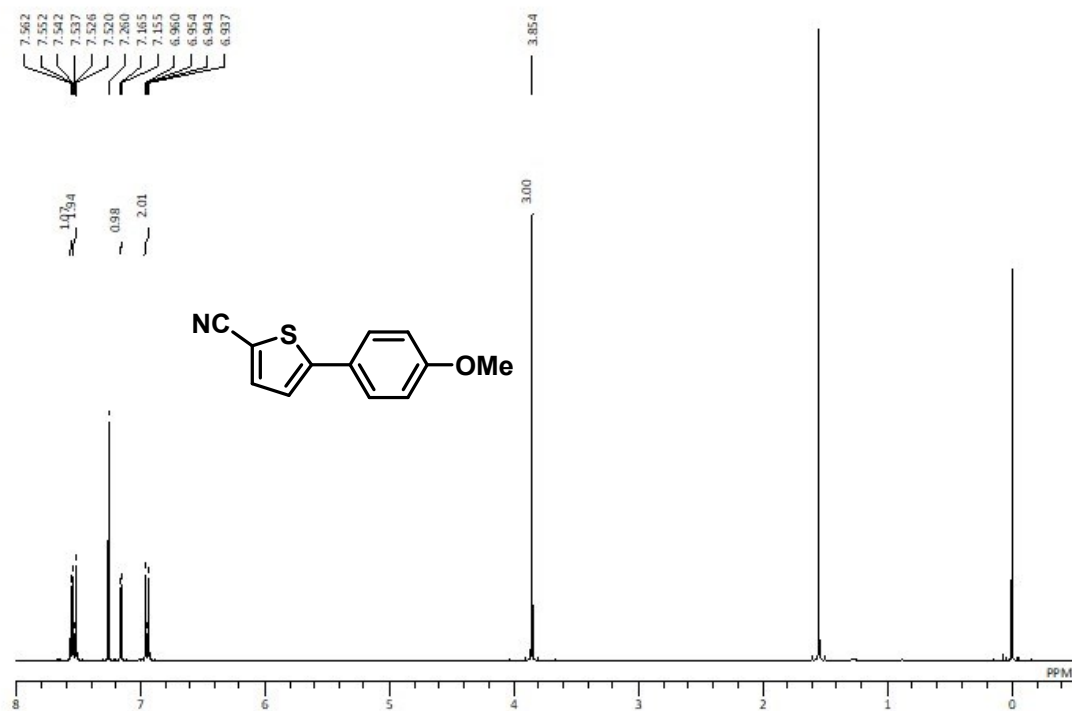

Figure S5.  $^1\text{H}$  NMR spectrum of 5-(4-methoxyphenyl)-2-cyanothiophene (400 MHz, chloroform-*d*, r.t.).

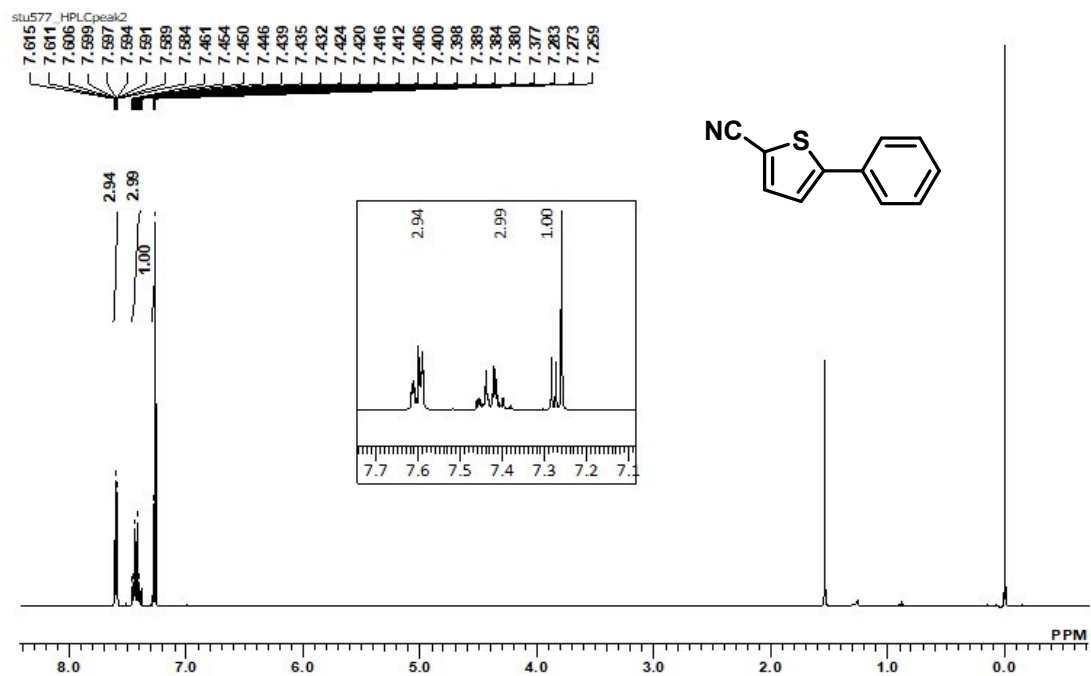

Figure S6.  $^1\text{H}$  NMR spectrum of 5-phenyl-2-cyanothiophene (400 MHz, chloroform-*d*, r.t.).

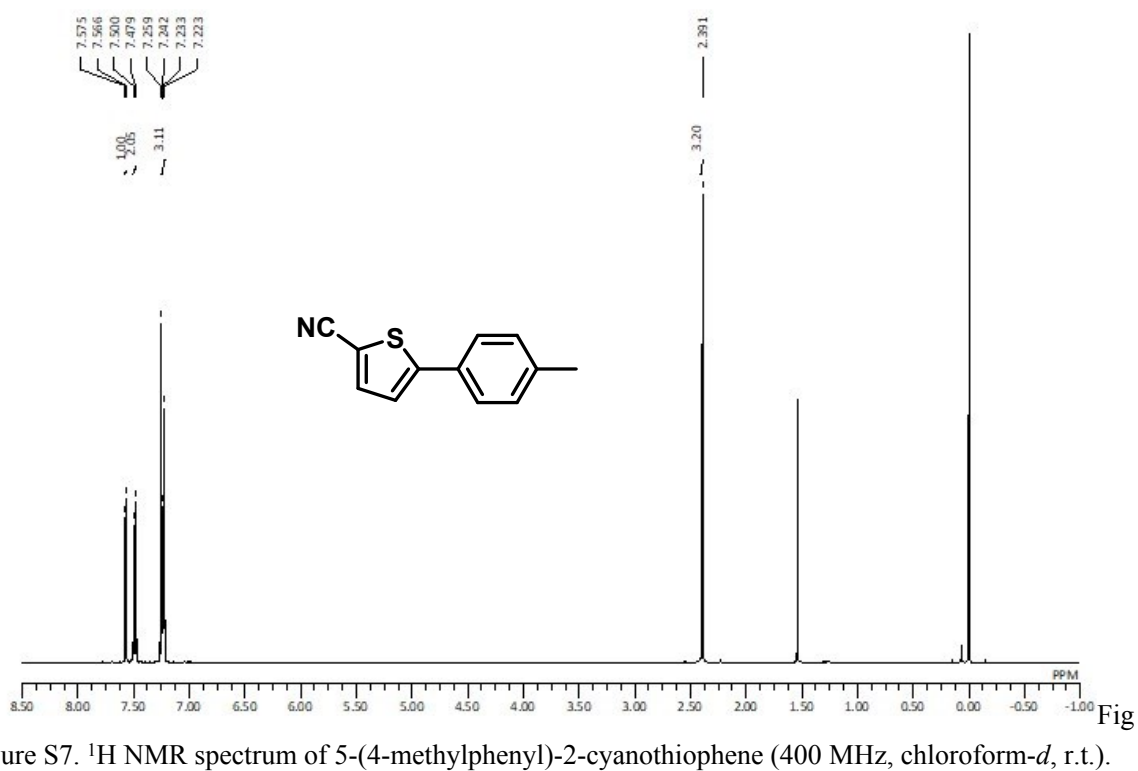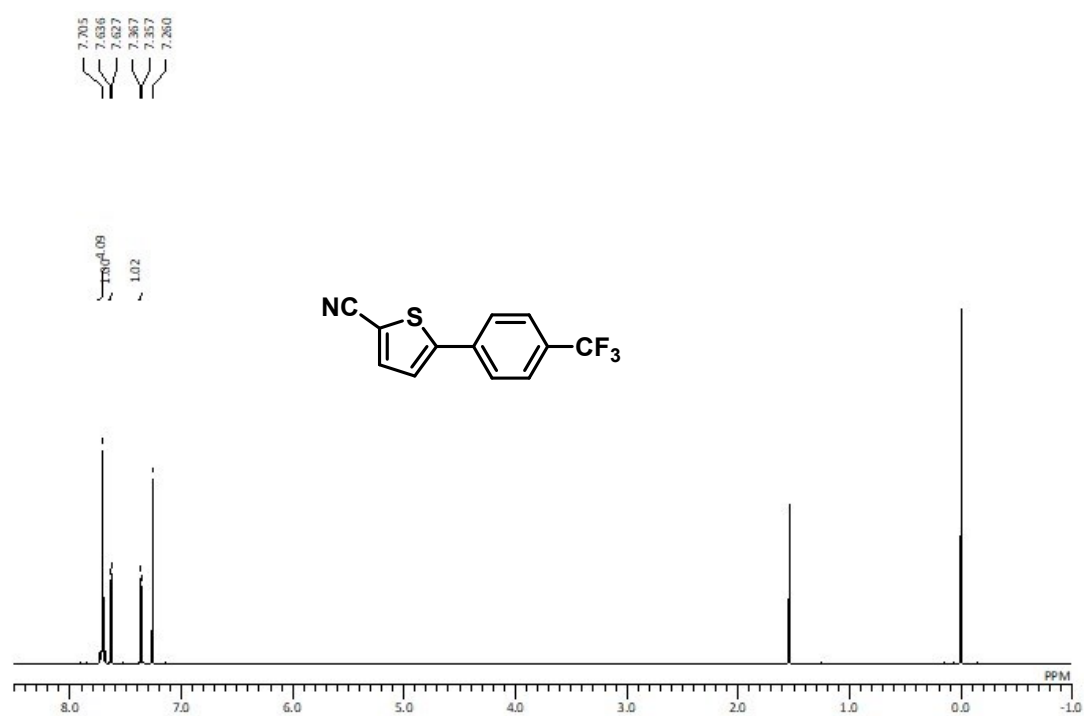

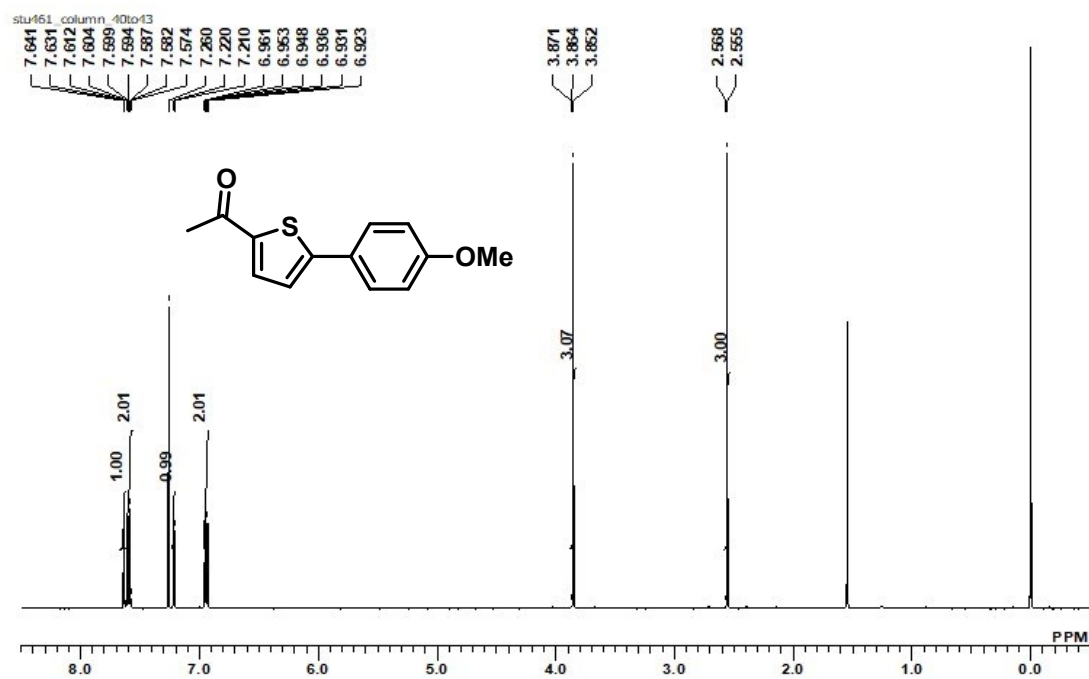

Figure S9.  $^1\text{H}$  NMR spectrum of 5-(4-methoxyphenyl)-2-cyanothiophene (400 MHz, chloroform-*d*, r.t.).

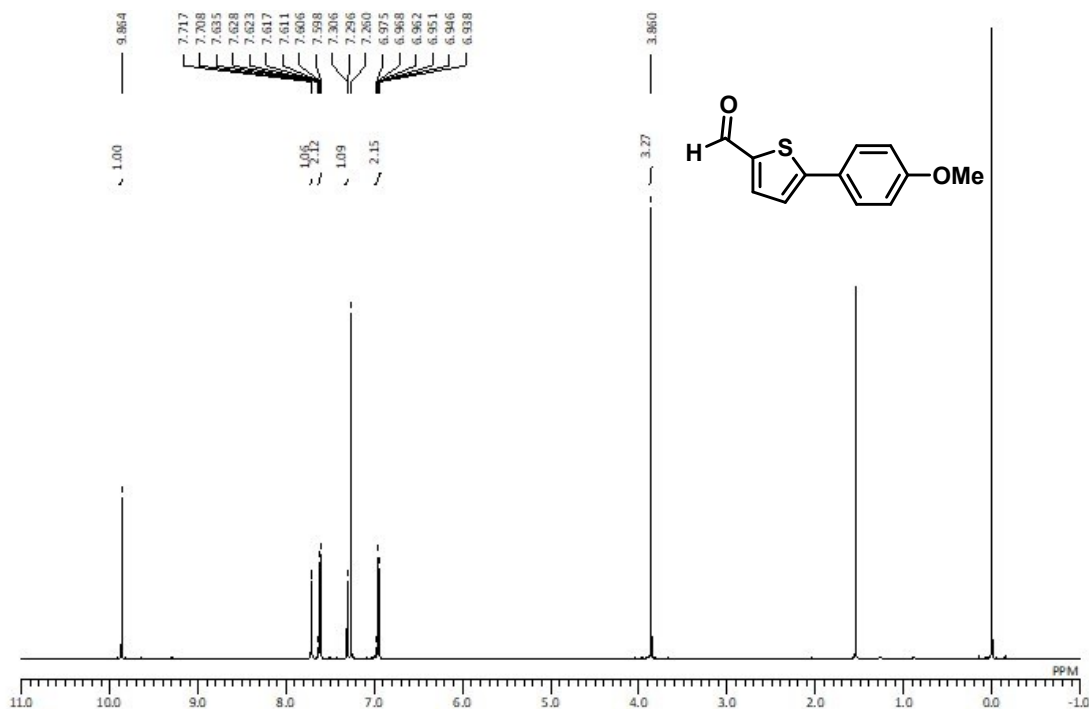

Figure S10.  $^1\text{H}$  NMR spectrum of 5-(4-methoxyphenyl)-2-formylthiophene (400 MHz, chloroform-*d*, r.t.).

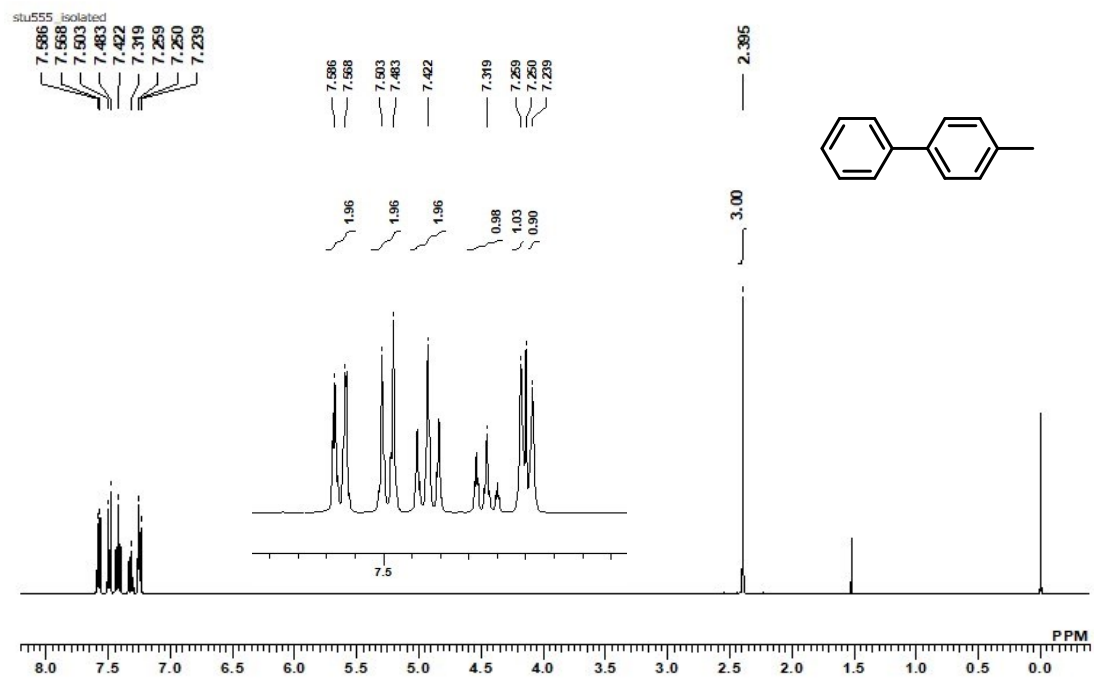

Figure S11.  $^1\text{H}$  NMR spectrum of 4-methylbiphenyl (400 MHz, chloroform-*d*, r.t.).

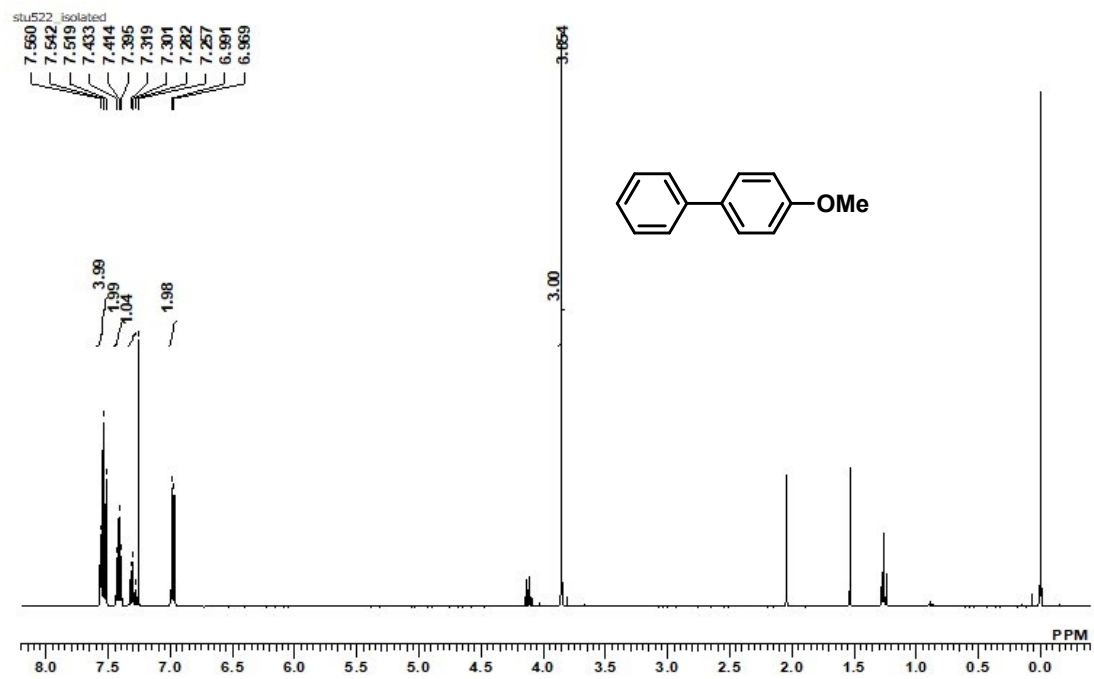

Figure S12.  $^1\text{H}$  NMR spectrum of 4-methoxybiphenyl (400 MHz, chloroform-*d*, r.t.).



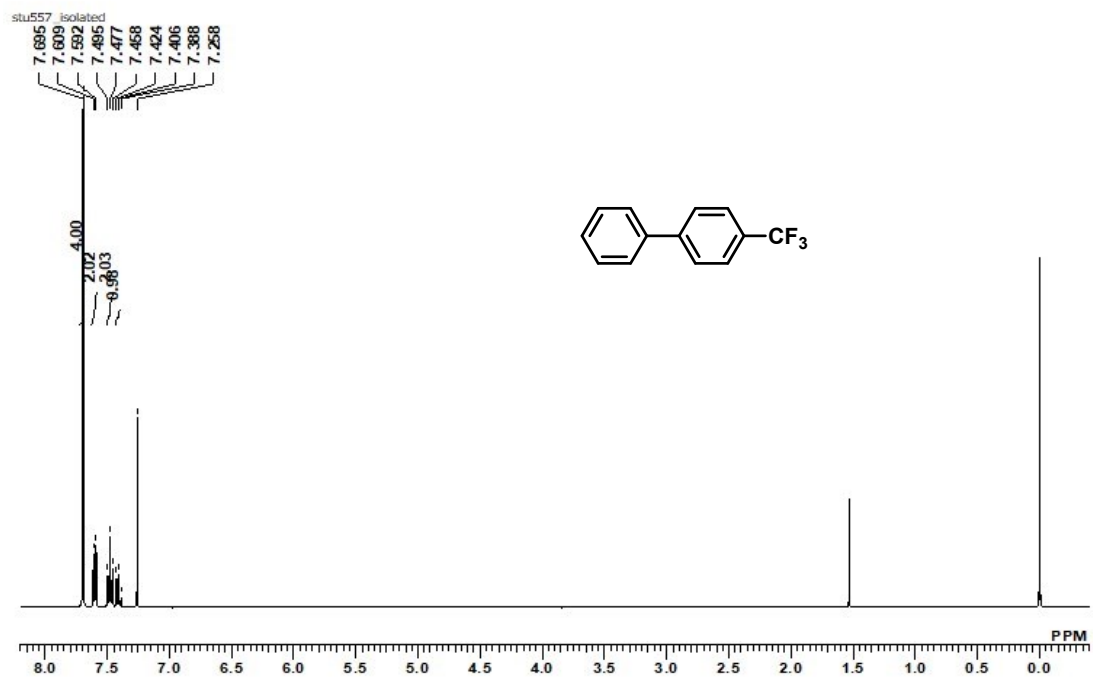

Figure S13. <sup>1</sup>H NMR spectrum of 4-trifluoromethylbiphenyl (400 MHz, chloroform-*d*, r.t.).

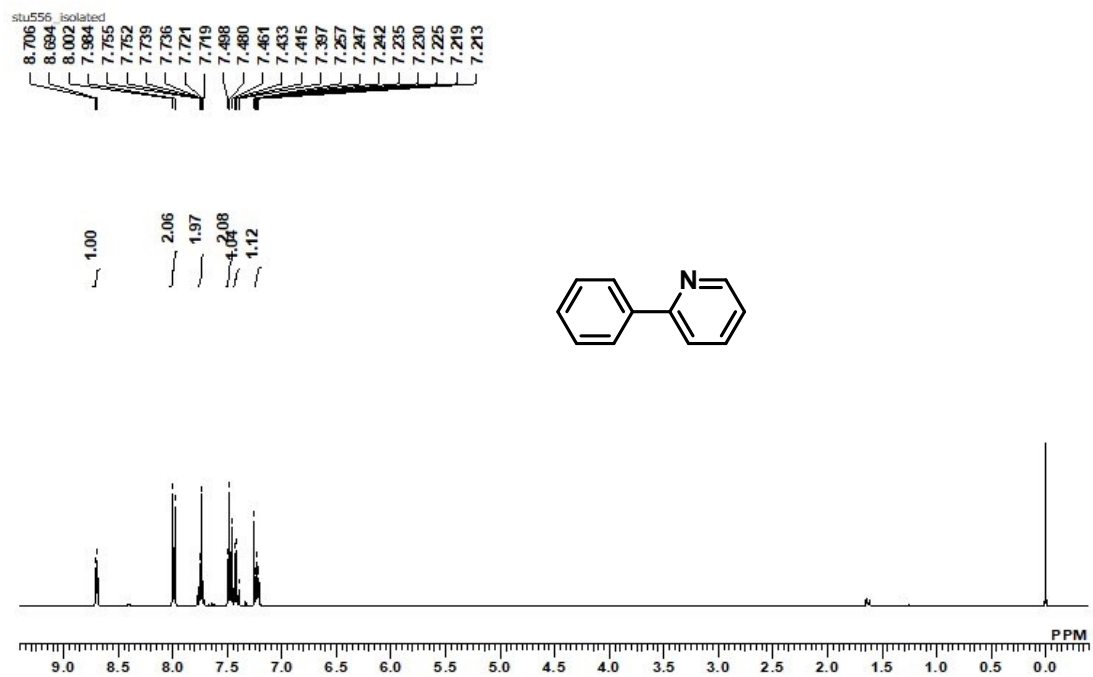

Figure S14. <sup>1</sup>H NMR spectrum of 2-phenylpyridine (400 MHz, chloroform-*d*, r.t.).

Table S1. Optimizing reaction condition of Suzuki-Miyaura cross-coupling reaction.

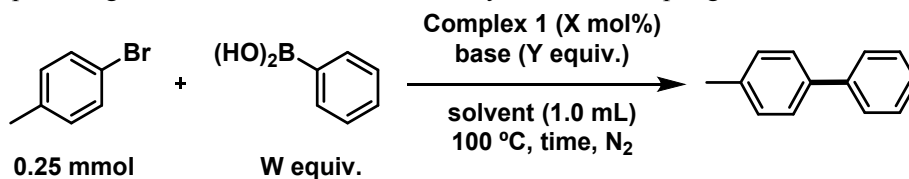

| entry           | W    | X   | base                            | Y | solvent     | time<br>(h) | NMR yield <sup>a</sup><br>(%) |
|-----------------|------|-----|---------------------------------|---|-------------|-------------|-------------------------------|
| S1              | 1.05 | 1   | Cs <sub>2</sub> CO <sub>3</sub> | 1 | DMF         | 5           | 74                            |
| S2              | 1.05 | 1   | Cs <sub>2</sub> CO <sub>3</sub> | 1 | toluene     | 5           | 35                            |
| S3              | 1.05 | 1   | Cs <sub>2</sub> CO <sub>3</sub> | 1 | 1,4-dioxane | 5           | 88                            |
| S4              | 1.2  | 1   | Cs <sub>2</sub> CO <sub>3</sub> | 1 | 1,4-dioxane | 5           | 77                            |
| S5              | 1.05 | 1   | Cs <sub>2</sub> CO <sub>3</sub> | 2 | 1,4-dioxane | 5           | 94                            |
| S6 <sup>b</sup> | 1.05 | 0.5 | Cs <sub>2</sub> CO <sub>3</sub> | 2 | 1,4-dioxane | 4           | 96                            |
| S7 <sup>b</sup> | 1.05 | 0.5 | K <sub>2</sub> CO <sub>3</sub>  | 2 | 1,4-dioxane | 4           | quant.                        |

<sup>a</sup>The yield was determined by <sup>1</sup>H NMR analyses of a crude product with ferrocene as an internal standard. <sup>b</sup>0.5 mmol scale.

Table S2. Crystallographic data of Complex 3

| Complex 3                                           |                                                                                                     |
|-----------------------------------------------------|-----------------------------------------------------------------------------------------------------|
| Empirical Formula                                   | C <sub>53</sub> H <sub>56</sub> F <sub>18</sub> O <sub>2</sub> P <sub>2</sub> Pd·C <sub>3.5</sub> O |
| Formula Weight                                      | 1293.38                                                                                             |
| Crystal Color                                       | colorless                                                                                           |
| Crystal Dimensions / mm                             | 0.35 x 0.25 x 0.2                                                                                   |
| Crystal System                                      | triclinic                                                                                           |
| Lattice Parameters                                  |                                                                                                     |
| <i>a</i> / Å                                        | 14.2183(11)                                                                                         |
| <i>b</i> / Å                                        | 14.2230(9)                                                                                          |
| <i>c</i> / Å                                        | 15.4574(11)                                                                                         |
| <i>α</i> / deg.                                     | 102.2520(10)                                                                                        |
| <i>β</i> / deg.                                     | 92.1720(10)                                                                                         |
| <i>γ</i> / deg.                                     | 110.8340(10)                                                                                        |
| <i>V</i> / Å <sup>3</sup>                           | 2832.9(3)                                                                                           |
| Space Group                                         | <i>P</i> -1 (#2)                                                                                    |
| <i>Z</i>                                            | 2                                                                                                   |
| <i>D</i> / gcm <sup>-3</sup>                        | 1.516                                                                                               |
| <i>F</i> 000                                        | 1314.0                                                                                              |
| <i>μ</i> (MoK $\alpha$ ) / cm <sup>-1</sup>         | 4.864                                                                                               |
| Reflection/Parameter Ratio                          | 17.07                                                                                               |
| <i>R</i> 1 ( <i>I</i> > 2.00 $\sigma$ ( <i>I</i> )) | 0.0443                                                                                              |
| <i>R</i> (All reflections)                          | 0.0473                                                                                              |
| <i>wR</i> 2 (All reflections)                       | 0.1178                                                                                              |
| Goodness of Fit Indicator                           | 1.061                                                                                               |

The crystal contains disordered toluene molecules and water molecules as cocrystalizing species.

#### References

- S1 A. Ariaifard and Z. Lin, *Organometallics*, 2006, **25**, 4030–4033.  
 S2 L. P. Wolters, W. J. Van Zeist and F. M. Bickelhaupt, *Chem. Eur. J.*, 2014, **20**, 11370–11381.
